# Supplementary material
Source: PubMed Central journal article supplement (PMC1435361)
Supplement: NIHMS7615-supplement-suppfigs.pdf [file NIHMS7615-supplement-suppfigs.pdf]

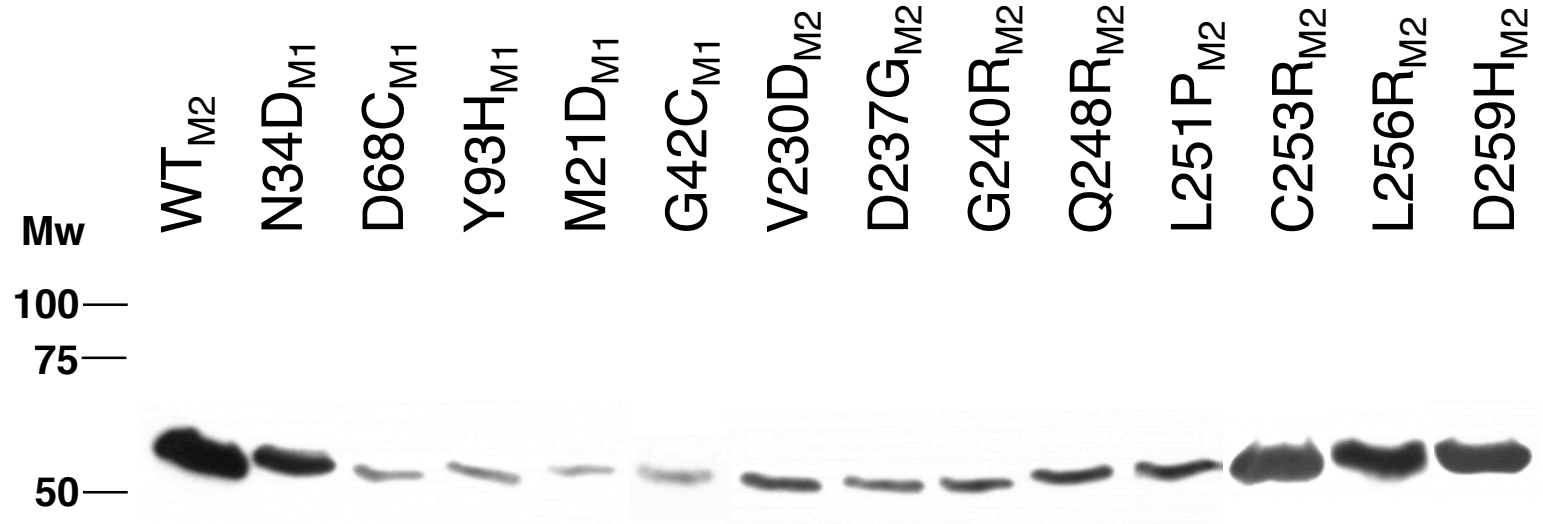

**A**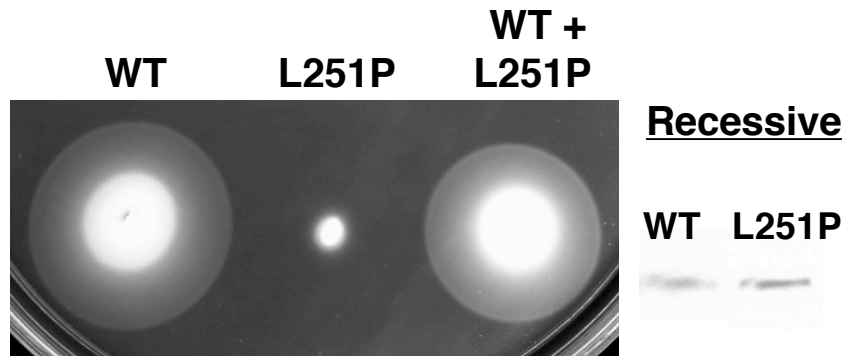

0.5 $\mu$ M sodium salicylate, 0.2mM IPTG

**B**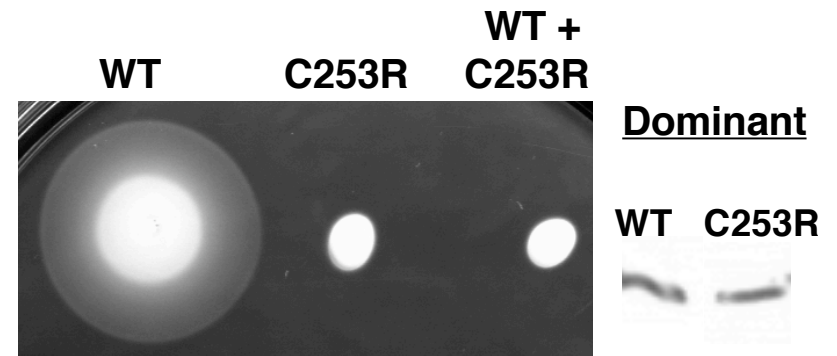

0.5 $\mu$ M sodium salicylate, 0mM IPTG

**C**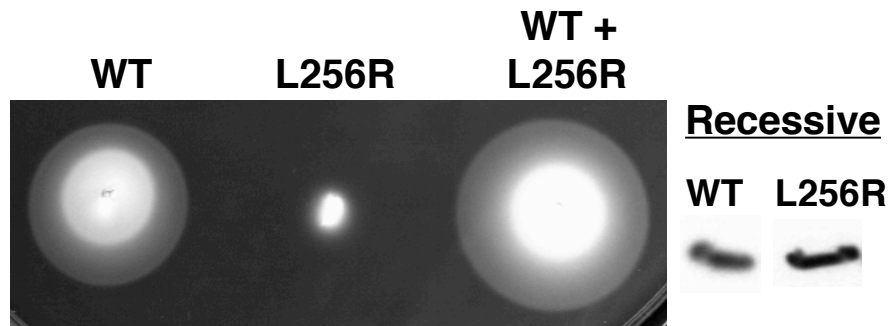

1 $\mu$ M sodium salicylate, 0.05mM IPTG

**D**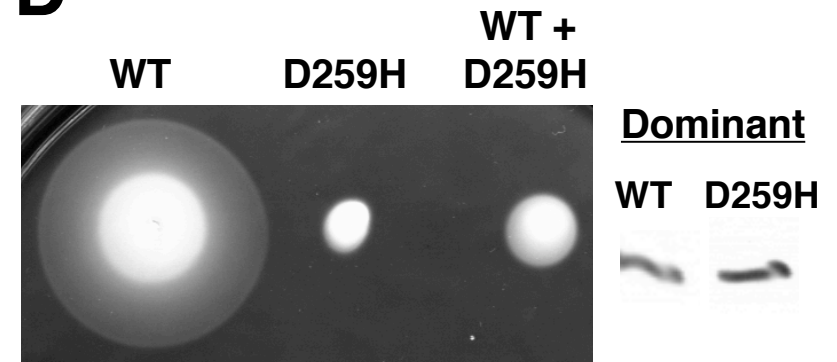

0.5 $\mu$ M sodium salicylate, 0.2mM IPTG
