# Supplementary material
Source: PubMed Central journal article supplement (PMC1435361)
Supplement: NIHMS7615-supplement-supptables.pdf [file NIHMS7615-supplement-supptables.pdf]

**Table S1.** Summary of Aer heterodimer results

| Aer mutant <sup>a</sup>      |                                | Heterodimer phenotype <sup>b</sup> |
|------------------------------|--------------------------------|------------------------------------|
| pACYC-derived construct (M1) | pTrc99A-derived construct (M2) |                                    |
| N34D                         | V230D                          | Aerotactic                         |
| N34D                         | D237G                          | Aerotactic                         |
| N34D                         | G240R                          | Aerotactic                         |
| N34D                         | Q248R                          | Aerotactic                         |
| N34D                         | L251P                          | Aerotactic                         |
| N34D                         | C253R                          | Partially aerotactic               |
| N34D                         | L256R                          | Aerotactic                         |
| N34D                         | D259H                          | Aerotactic                         |
| N34D                         | N34D                           | Non-aerotactic                     |
| G42C                         | V230D                          | Aerotactic                         |
| G42C                         | D237G                          | Aerotactic                         |
| G42C                         | G240R                          | Aerotactic                         |
| G42C                         | Q248R                          | Aerotactic                         |
| G42C                         | L251P                          | Partially aerotactic               |
| G42C                         | C253R                          | Partially aerotactic               |
| G42C                         | L256R                          | Non-aerotactic                     |
| G42C                         | D259H                          | Non-aerotactic                     |
| G42C                         | N34D                           | Non-aerotactic                     |
| D68C                         | V230D                          | Aerotactic                         |
| D68C                         | D237G                          | Aerotactic                         |
| D68C                         | G240R                          | Aerotactic                         |
| D68C                         | Q248R                          | Aerotactic                         |
| D68C                         | L251P                          | Non-aerotactic                     |
| D68C                         | C253R                          | Partially aerotactic               |
| D68C                         | L256R                          | Non-aerotactic                     |
| D68C                         | D259H                          | Non-aerotactic                     |
| D68C                         | N34D                           | Non-aerotactic                     |
| Y93H                         | V230D                          | Aerotactic                         |
| Y93H                         | D237G                          | Aerotactic                         |
| Y93H                         | G240R                          | Aerotactic                         |
| Y93H                         | Q248R                          | Aerotactic                         |
| Y93H                         | L251P                          | Partially aerotactic               |
| Y93H                         | C253R                          | Partially aerotactic               |
| Y93H                         | L256R                          | Non-aerotactic                     |
| Y93H                         | D259H                          | Partially aerotactic               |
| Y93H                         | N34D                           | Non-aerotactic                     |
| M21D                         | V230D                          | Aerotactic                         |
| M21D                         | D237G                          | Partially aerotactic               |
| M21D                         | G240R                          | Aerotactic                         |
| M21D                         | Q248R                          | Aerotactic                         |
| M21D                         | L251P                          | Non-aerotactic                     |
| M21D                         | C253R                          | Partially aerotactic               |
| M21D                         | L256R                          | Non-aerotactic                     |
| M21D                         | D259H                          | Partially aerotactic               |
| M21D                         | N34D                           | Non-aerotactic                     |
| N34D                         | V230D/D237G                    | Partially aerotactic               |
| N34D                         | V230D/G240R                    | Aerotactic                         |
| N34D                         | V230D/Q248R                    | Partially aerotactic               |
| N34D/M341T                   | Q248R                          | Aerotactic                         |
| N34D                         | Q248R/M341T                    | Non-aerotactic                     |
| Q248R                        | M341T                          | Aerotactic                         |
| Q248R                        | Aer[1-490]                     | Aerotactic                         |
| Q248R                        | Aer[1-285]                     | Aerotactic                         |
| Q248R                        | Aer[1-260]                     | Partially aerotactic               |
| Q248R                        | Aer[1-256]                     | Non-aerotactic                     |
| Q248R                        | Aer[1-253]                     | Non-aerotactic                     |
| Q248R                        | Aer[1-250]                     | Non-aerotactic                     |
| N34D                         | Aer[1-490]                     | Non-aerotactic                     |
| N34D                         | Aer[1-285]                     | Non-aerotactic                     |
| N34D                         | Aer[1-260]                     | Non-aerotactic                     |
| N34D                         | Aer[1-256]                     | Non-aerotactic                     |
| N34D                         | Aer[1-253]                     | Non-aerotactic                     |
| Q248R                        | Aer[120-506]                   | Aerotactic                         |
| Q248R                        | Aer[165-506]                   | Non-aerotactic                     |
| Q248R                        | Aer[120-490]                   | Aerotactic                         |
| Q248R                        | Aer[120-285] <sup>His6x</sup>  | Non-aerotactic                     |

**a.** Full-length Aer[1-506] unless indicated

**b.** Heterodimer results in BT3400 based on 30 mM succinate swarm plate analysis

**Table S2.** Strains, plasmids and primers

| Strain, plasmid or primer  | Relevant properties or primer sequence (5' to 3')                                                                | Reference                                           |
|----------------------------|------------------------------------------------------------------------------------------------------------------|-----------------------------------------------------|
| <b>Strains</b>             |                                                                                                                  |                                                     |
| BT3312                     | <i>Δaer-1 Δtsr-7028</i>                                                                                          | (Repik <i>et al.</i> , 2000)                        |
| BW10724                    | <i>λ recA<sup>+</sup>/recA::cat-aadA Δlac-169 pho-510 thi</i>                                                    | (Metcalf and Wanner, 1993; Wanner and Boline, 1990) |
| BT3400                     | <i>Δaer-1 Δtsr-7028 recA::cat</i>                                                                                | This study                                          |
| <b>Plasmids</b>            |                                                                                                                  |                                                     |
| pTrc99A                    | <i>p<sub>trc</sub></i> expression vector, <i>ColE1 lacI<sup>f</sup></i>                                          | Pharmacia                                           |
| pProEX™ HTa                | <i>p<sub>trc</sub></i> expression vector with an N-terminal His <sub>6x</sub> tag, <i>ColE1 lacI<sup>f</sup></i> | Invitrogen                                          |
| pACYC184                   | <i>p15A</i>                                                                                                      | (Chang and Cohen, 1978)                             |
| pGH1                       | pTrc99A Aer <sup>+</sup> [1-506]                                                                                 | (Repik <i>et al.</i> , 2000)                        |
| pQH16                      | pGH1 Aer-Δ HAMP (204-281), BstBI and SacI sites                                                                  | (Ma <i>et al.</i> , 2005)                           |
| pKW1                       | pQH16 Aer-WT HAMP <sup>+</sup> (204-281), NheI site                                                              | (Watts <i>et al.</i> , 2004)                        |
| pKW6                       | pKW1 Aer[V230D]                                                                                                  | (Watts <i>et al.</i> , 2004)                        |
| pKW2                       | pKW1 Aer[D237G]                                                                                                  | (Watts <i>et al.</i> , 2004)                        |
| pKW3                       | pKW1 Aer[G240R]                                                                                                  | (Watts <i>et al.</i> , 2004)                        |
| pKW11                      | pKW1 Aer[Q248R]                                                                                                  | (Watts <i>et al.</i> , 2004)                        |
| pKW4                       | pKW1 Aer[L251P]                                                                                                  | (Watts <i>et al.</i> , 2004)                        |
| pKW5                       | pKW1 Aer[C253R]                                                                                                  | (Watts <i>et al.</i> , 2004)                        |
| pKW80                      | pKW1 Aer[L256R]                                                                                                  | This study                                          |
| pKW13                      | pKW1 Aer[D259H]                                                                                                  | (Watts <i>et al.</i> , 2004)                        |
| pKW82                      | pKW2 Aer[V230D/D237G]                                                                                            | This study                                          |
| pKW83                      | pKW3 Aer[V230D/G240R]                                                                                            | This study                                          |
| pKW84                      | pKW11 Aer[V230D/Q248R]                                                                                           | This study                                          |
| pKW81                      | pKW1 Aer[M341T]                                                                                                  | This study                                          |
| pKW85                      | pKW11 Aer[Q248R/M341T]                                                                                           | This study                                          |
| pKW74                      | pKW1 Aer[N34D]                                                                                                   | (Watts <i>et al.</i> , 2004)                        |
| pKW86                      | pKW1 Aer[D68C]                                                                                                   | This study                                          |
| pKW87                      | pKW1 Aer[G42C]                                                                                                   | This study                                          |
| pKW88                      | pKW1 Aer[Y93H]                                                                                                   | This study                                          |
| pKS1                       | pGH1 Aer[M21D]                                                                                                   | K. Sommer                                           |
| pKW89                      | pACYC184 <i>p<sub>trc</sub> lacI<sup>f</sup></i> Aer[N34D]                                                       | This study                                          |
| pKW90                      | pACYC184 <i>p<sub>trc</sub> lacI<sup>f</sup></i> Aer[D68C]                                                       | This study                                          |
| pKW91                      | pACYC184 <i>p<sub>trc</sub> lacI<sup>f</sup></i> Aer[G42C]                                                       | This study                                          |
| pKW92                      | pACYC184 <i>p<sub>trc</sub> lacI<sup>f</sup></i> Aer[Y93H]                                                       | This study                                          |
| pKW93                      | pACYC184 <i>p<sub>trc</sub> lacI<sup>f</sup></i> Aer[M21D]                                                       | This study                                          |
| pKW94                      | pACYC184 <i>p<sub>trc</sub> lacI<sup>f</sup></i> Aer[Q248R]                                                      | This study                                          |
| pKW95                      | pACYC184 <i>p<sub>trc</sub> lacI<sup>f</sup></i> Aer[N34D/M341T]                                                 | This study                                          |
| pAJC1                      | pTrc99A Aer[1-490], Δ491-506                                                                                     | A. Campbell                                         |
| pKW96                      | pTrc99A Aer[1-285], Δ286-506                                                                                     | This study                                          |
| pKW97                      | pTrc99A Aer[1-260], Δ261-506                                                                                     | This study                                          |
| pKW98                      | pTrc99A Aer[1-256], Δ257-506                                                                                     | This study                                          |
| pKW99                      | pTrc99A Aer[1-253], Δ254-506                                                                                     | This study                                          |
| pKW100                     | pTrc99A Aer[1-250], Δ251-506                                                                                     | This study                                          |
| pKW101                     | pTrc99A Aer[120-506], Δ1-119                                                                                     | This study                                          |
| pKW102                     | pTrc99A Aer[165-506], Δ1-164                                                                                     | This study                                          |
| pKW103                     | pTrc99A Aer[120-490], Δ[1-119/491-506]                                                                           | This study                                          |
| pKW104                     | pProEX™ HTa Aer[120-285], Δ[1-119/286-506]                                                                       | This study                                          |
| pKG117                     | <i>p<sub>nahG</sub></i> expression vector, <i>p15A</i> , Aer <sup>+</sup> [1-506]                                | K. Gosink                                           |
| pDS7                       | pKG117, tet                                                                                                      | D. Salcedo                                          |
| <b>Primers<sup>a</sup></b> |                                                                                                                  |                                                     |
| pTrcSphIF                  | GAAGCGGCATGCATTTACGTTGACACCATCG                                                                                  | This study                                          |
| Aer490SphIR                | TTAATGCATGCTTACATCGCCGACACCTGCGCACTCTC                                                                           | This study                                          |
| Aer285SphIR                | CGACATGCATGCTTAGGTATGTTTCGTTGAGCTCATCGGTGCC                                                                      | This study                                          |
| Aer260SphIR                | CGACATGCATGCTTAGACATCGTTAATTAGCCAACGGCACATC                                                                      | This study                                          |
| Aer256SphIR                | CGACATGCATGCTTATAGCCAACGGCACATCAGGCCAAGTTG                                                                       | This study                                          |
| Aer253SphIR                | CGACATGCATGCTTAGCACATCAGGCCAAGTTGCCCTAC                                                                          | This study                                          |
| Aer250SphIR                | CGACATGCATGCTTAGCCAAGTTGCCCTACCGCACGTAATGTC                                                                      | This study                                          |
| Aer120NcoIF                | GACATGCCATGGATGAAGAGATCGCGGGCGTGGAG                                                                              | This study                                          |
| Aer165NcoIF                | GACATGCCATGGCGCGTGGAGTGATGACCCTGATG                                                                              | This study                                          |
| Aer506SallIR               | CGAGGTGTCGACTTAATGCAGTACCGTCAACCGGTC                                                                             | This study                                          |
| Aer490SallIR               | CGAGGTGTCGACTTACATCGCCGACACCTGCGCACTCTC                                                                          | This study                                          |
| Aer285SallIR               | CGAGGTGTCGACTTAGGTATGTTTCGTTCAAGTTCATCGGTG                                                                       | This study                                          |

a. Restriction endonuclease recognition sites are underlined. Engineered start and stop codons are in bold.

## REFERENCES FOR TABLE S2

- Chang, A.C., and Cohen, S.N. (1978) Construction and characterization of amplifiable multicopy DNA cloning vehicles derived from the P15A cryptic miniplasmid. *J Bacteriol* **134**: 1141-1156.
- Ma, Q., Johnson, M.S., and Taylor, B.L. (2005) Genetic analysis of the HAMP domain of the Aer aerotaxis sensor localizes flavin adenine dinucleotide-binding determinants to the AS-2 helix. *J Bacteriol* **187**: 193-201.
- Metcalf, W.W., and Wanner, B.L. (1993) Evidence for a fourteen-gene, *phnC* to *phnP* locus for phosphonate metabolism in *Escherichia coli*. *Gene* **129**: 27-32.
- Repik, A., Rebbapragada, A., Johnson, M.S., Haznedar, J.O., Zhulin, I.B., and Taylor, B.L. (2000) PAS domain residues involved in signal transduction by the Aer redox sensor of *Escherichia coli*. *Mol Microbiol* **36**: 806-816.
- Wanner, B.L., and Boline, J.A. (1990) Mapping and molecular cloning of the *phn* (*psiD*) locus for phosphonate utilization in *Escherichia coli*. *J Bacteriol* **172**: 1186-1196.
- Watts, K.J., Ma, Q., Johnson, M.S., and Taylor, B.L. (2004) Interactions between the PAS and HAMP domains of the *Escherichia coli* aerotaxis receptor Aer. *J Bacteriol* **186**: 7440-7449.
